# Supplementary material for: Porphyrin-containing conjugated microporous polymers with gradient asymmetric design for efficient oxygen reduction
Source: Royal Society of Chemistry journal article supplement (doi:10.1039/d3ta08064a), 2024-01-01
Supplement: d3ta08064a1.pdf [file d3ta08064a1.pdf]

**Supporting Information for**

**Porphyrin-Containing Conjugated Microporous Polymer with Gradient Asymmetric Design for Efficient Oxygen Reduction**

Kunpeng Zheng,<sup>‡a</sup> Maorong Wang,<sup>‡a</sup> Binbin Wang,<sup>\*a</sup> Meilong Wang,<sup>a</sup> Zhong Wang<sup>b</sup> and Xiaojing Long<sup>\*a</sup>

<sup>a</sup>State Key Laboratory of Bio-fibers and Eco-textiles, Collaborative Innovation Center of Shandong Marine Biobased Fibers and Ecological textiles, Institute of Marine Biobased Materials, College of Materials Science and Engineering, Qingdao University, Qingdao 266071, P. R. China.

<sup>b</sup>Key Laboratory of Biofuels, Qingdao Institute of Bioenergy and Bioprocess Technology, Chinese Academy of Sciences, Qingdao 266101, China

\* To whom correspondence should be addressed. E-mail: Binbin Wang (15689986013@163.com); Xiaojing Long (longxj@qdu.edu.cn)

**Contents:**

- 1. Structural and morphology characterization**
- 2. Electrochemical performance**
- 3. NMR spectra**

## 1. Structural and morphology characterization

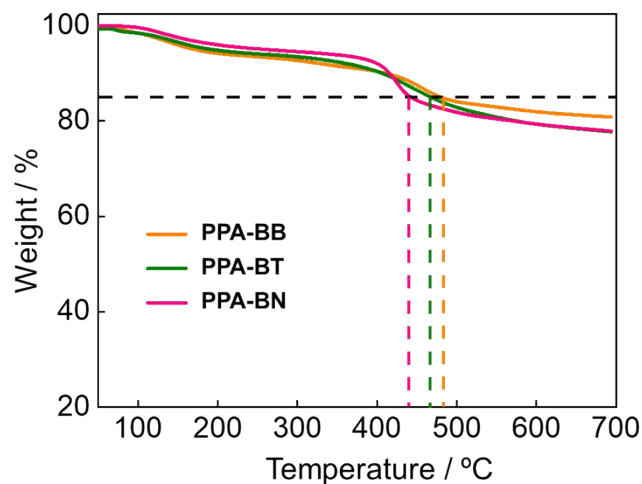

Fig. S1 Thermogravimetric analysis (TGA) of **PPA-BB**, **PPA-BT** and **PPA-BN**. They show good thermal stability with thermal decomposition temperature ( $T_d$ ) at 15% weight loss of 483 °C for **PPA-BB**, 466 °C for **PPA-BT**, and 440 °C for **PPA-BN**.

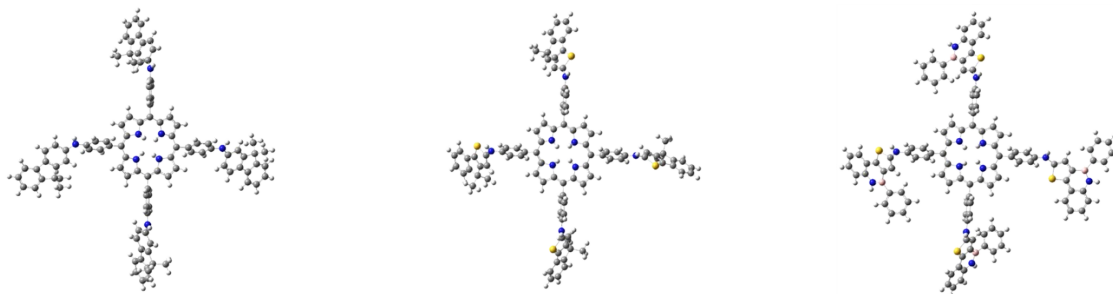

Fig. S2 Top View of model compounds of **PPA-BB**, **PPA-BT**, **PPA-BN**.

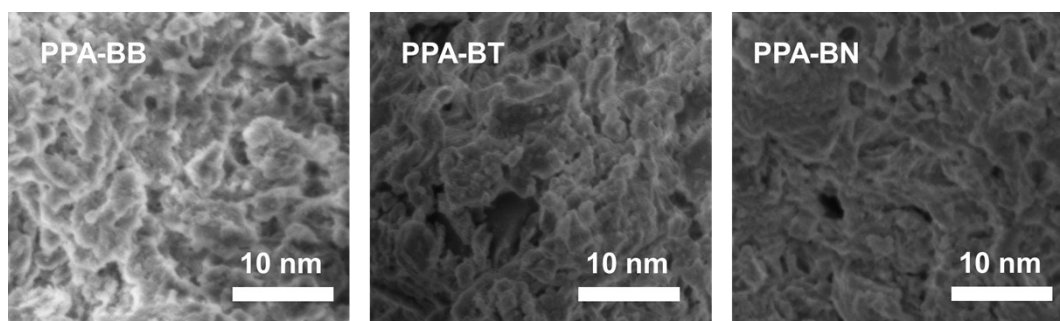

Fig. S3 SEM images of pure **PPA-BB**, **PPA-BT**, and **PPA-BN**.

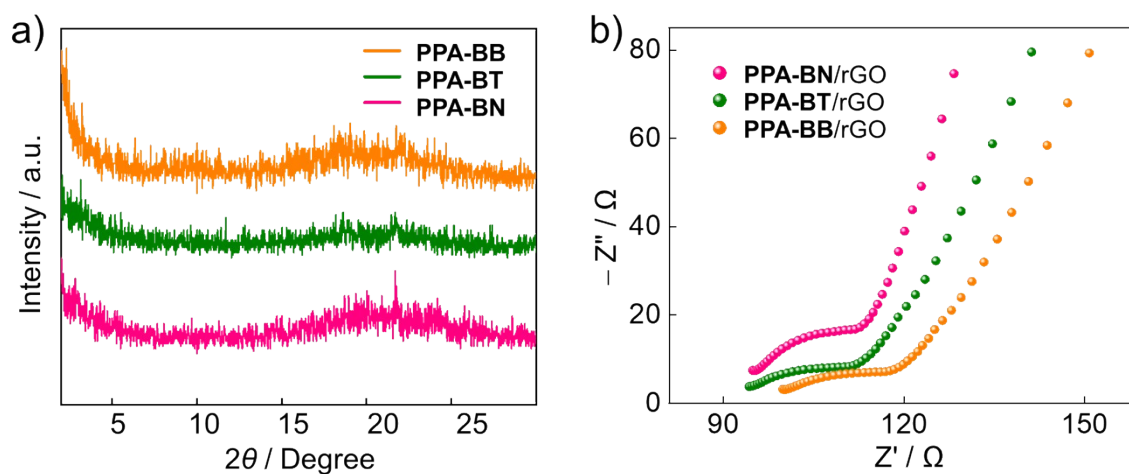

Fig. S4 a) Powder X-ray diffraction patterns of **PPA-BB**, **PPA-BT**, and **PPA-BN**. b) EIS spectra of **PPA-BB/rGO**, **PPA-BT/rGO**, **PPA-BN/rGO**.

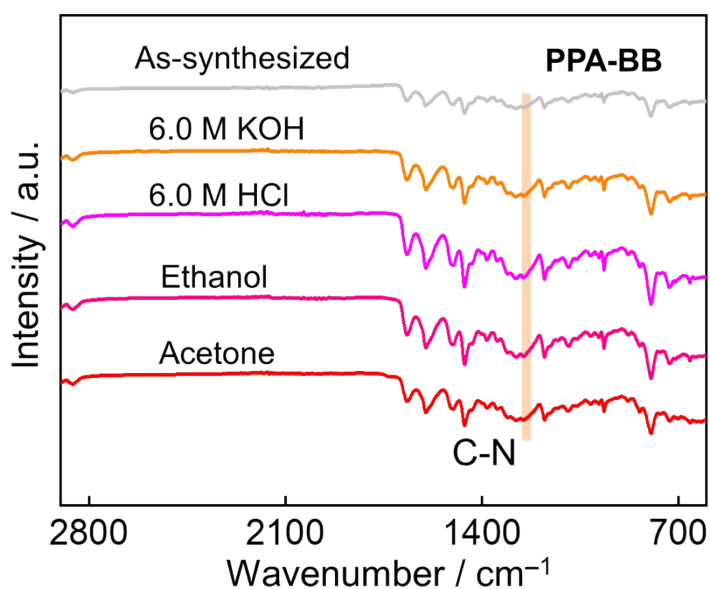

Fig. S5 FT-IR of **PPA-BB** before and after treatment under 6.0 M KOH, 6.0 M HCl, ethanol and acetone for 3 days.

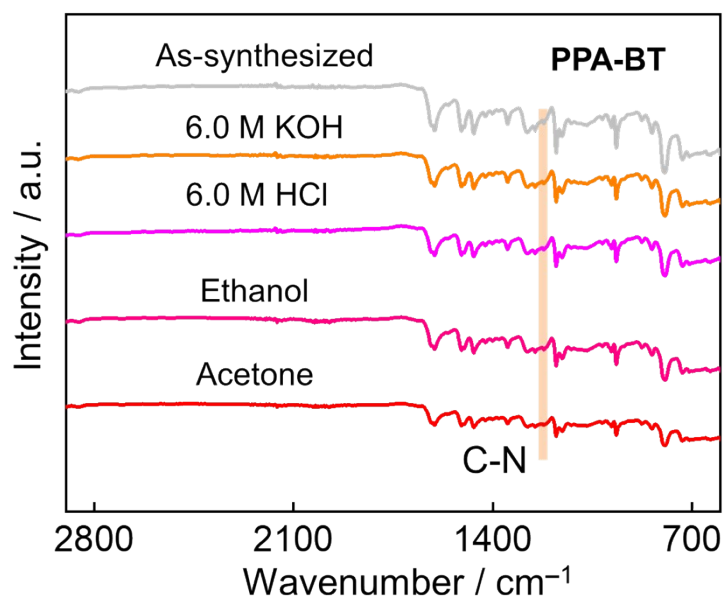

Fig. S6 FT-IR of **PPA-BT** before and after treatment under 6.0 M KOH, 6.0 M HCl, ethanol, and acetone for 3 days.

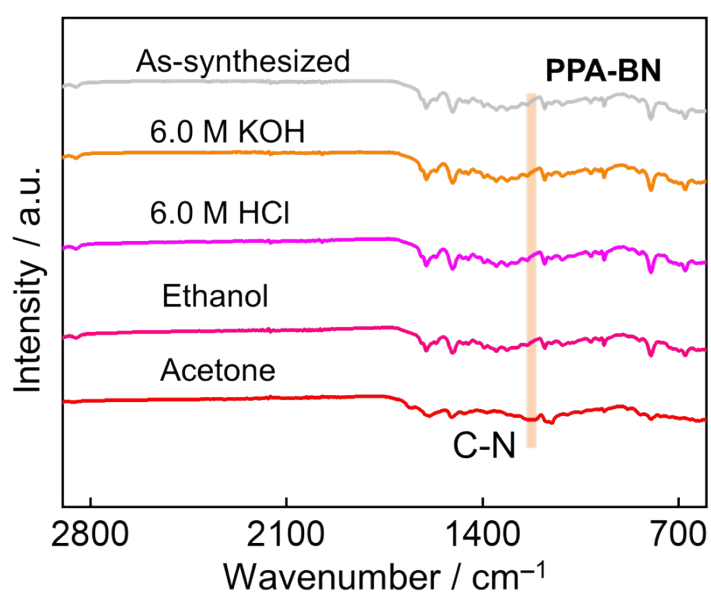

Fig. S7 FT-IR of **PPA-BN** before and after treatment under 6.0 M KOH, 6.0 M HCl, ethanol, and acetone for 3 days.

## 2. Electrochemical performance

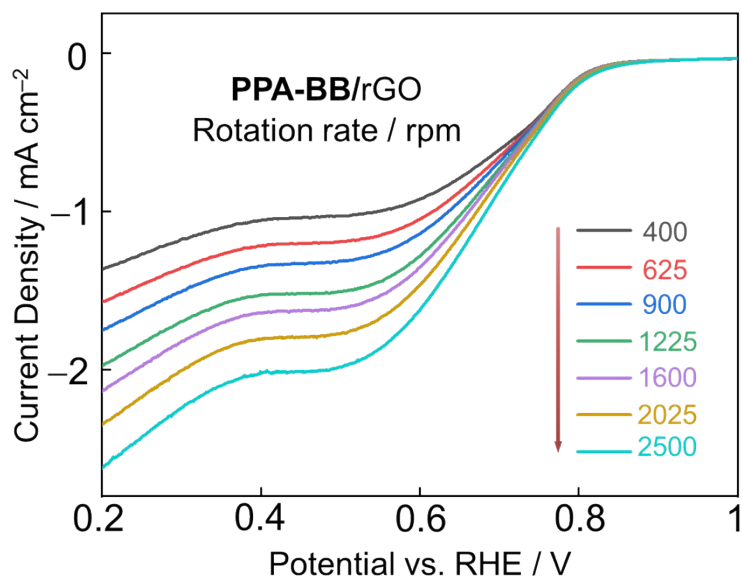

Fig. S8 LSV curves of **PPA-BB/rGO** from 400 to 2500 rpm.

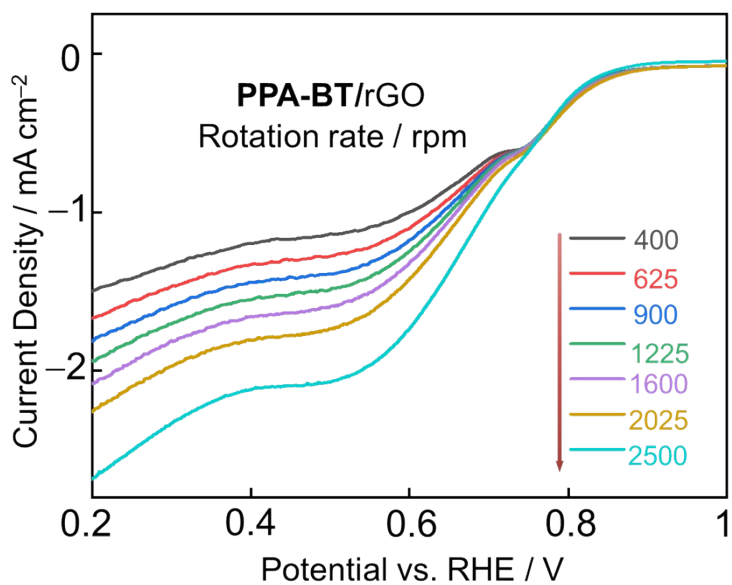

Fig. S9 LSV curves of **PPA-BT/rGO** from 400 to 2500 rpm.

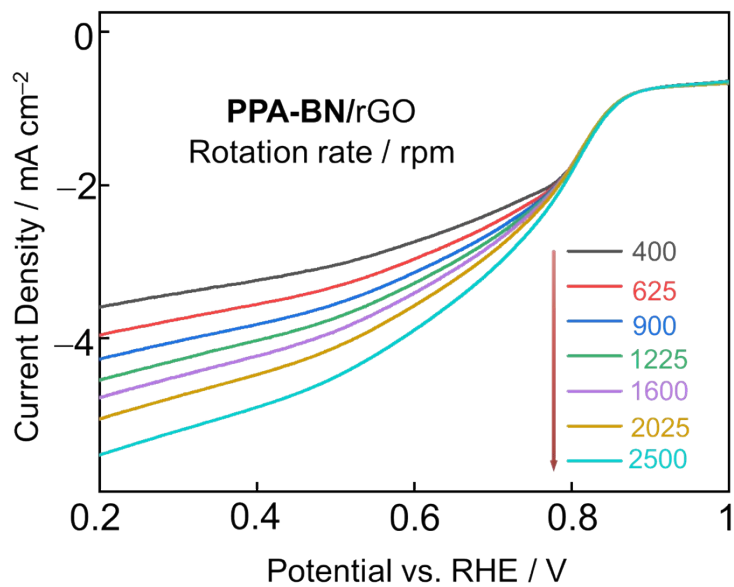

Fig. S10 LSV curves of **PPA-BN/rGO** from 400 to 2500 rpm.

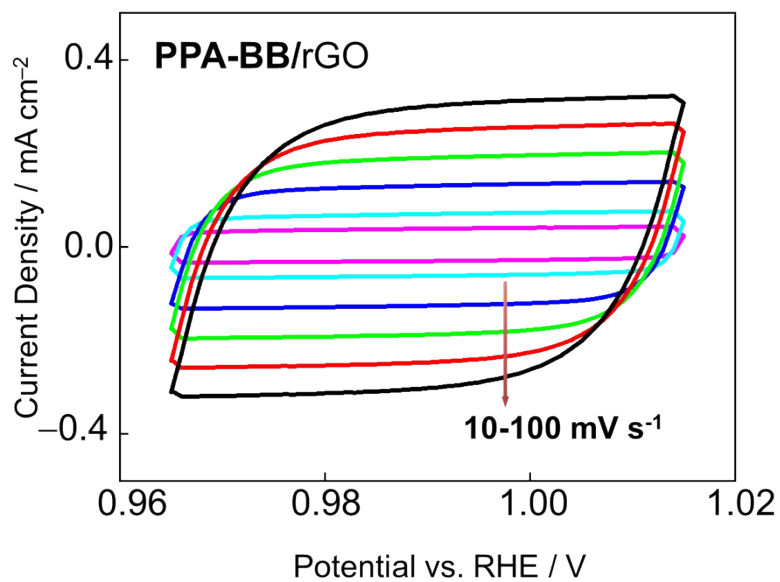

Fig. S11 CV curves of **PPA-BB/rGO** with the scan rate from 10 mV s<sup>-1</sup> to 100 mV s<sup>-1</sup>.

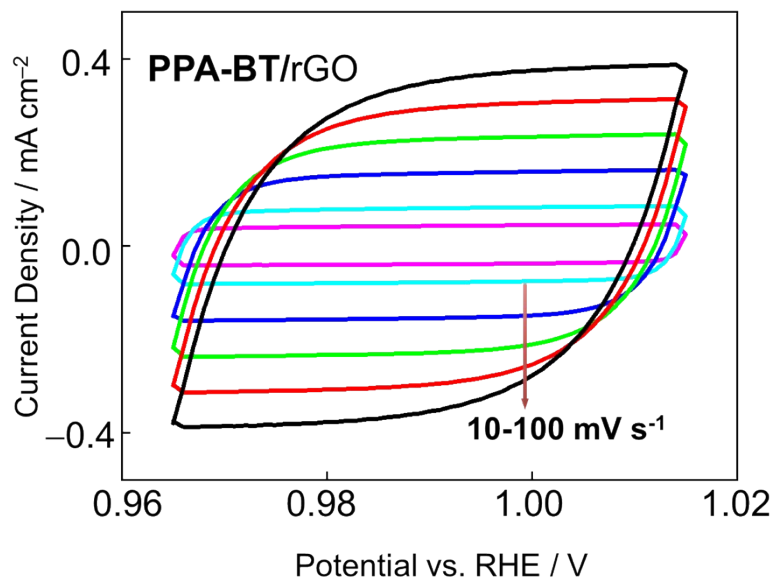

Fig. S12 CV curves of **PPA-BT/rGO** with the scan rate from 10 mV s<sup>-1</sup> to 100 mV s<sup>-1</sup>.

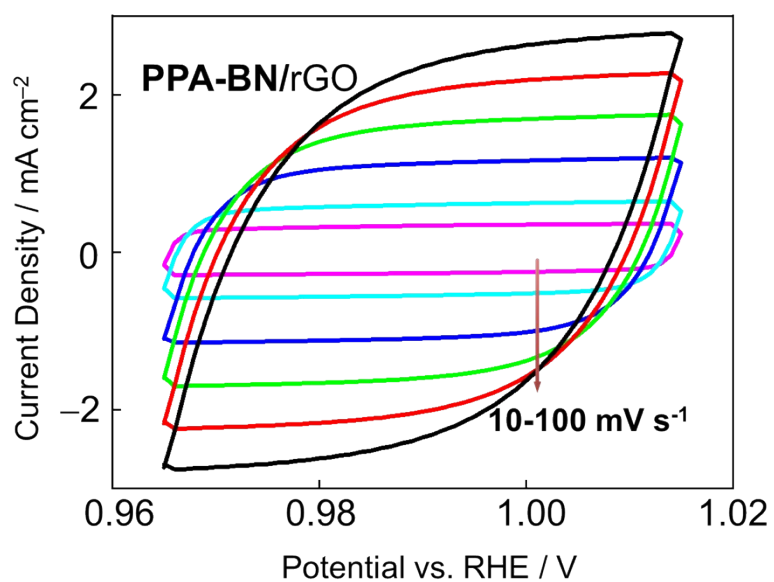

Fig. S13 CV curves of **PPA-BN/rGO** with the scan rate from 10 mV s<sup>-1</sup> to 100 mV s<sup>-1</sup>.

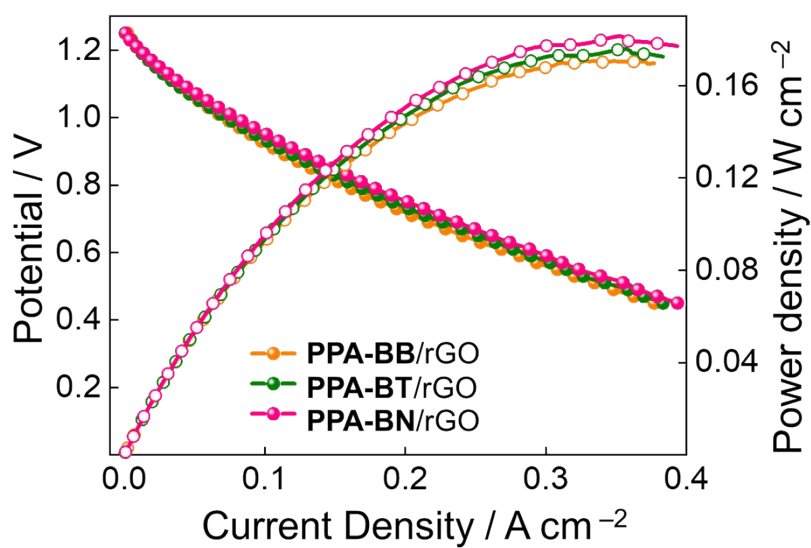

Fig. S14 Discharge polarization curve and corresponding power density plot of **PPA-BB/rGO**, **PPA-BT/rGO**, and **PPA-BN/rGO**.

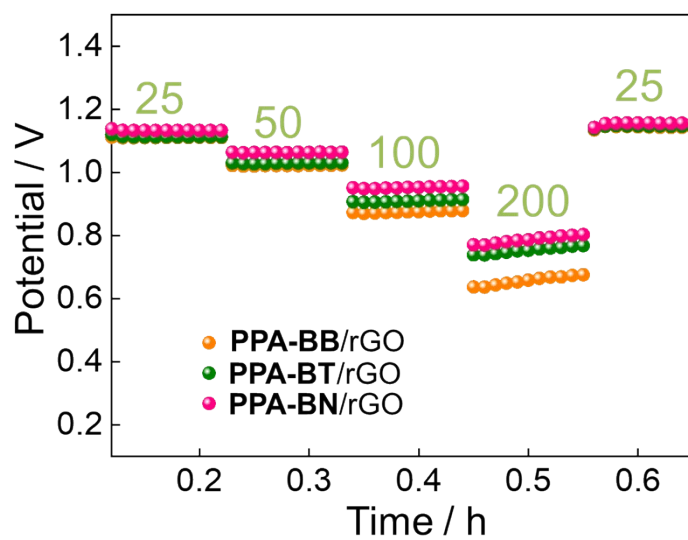

Fig. S15 Discharge curves of **PPA-BB/rGO**, **PPA-BT/rGO**, and **PPA-BN/rGO** based ZABs at different current densities (25, 50, 100, 200  $\text{mA cm}^{-2}$ ).



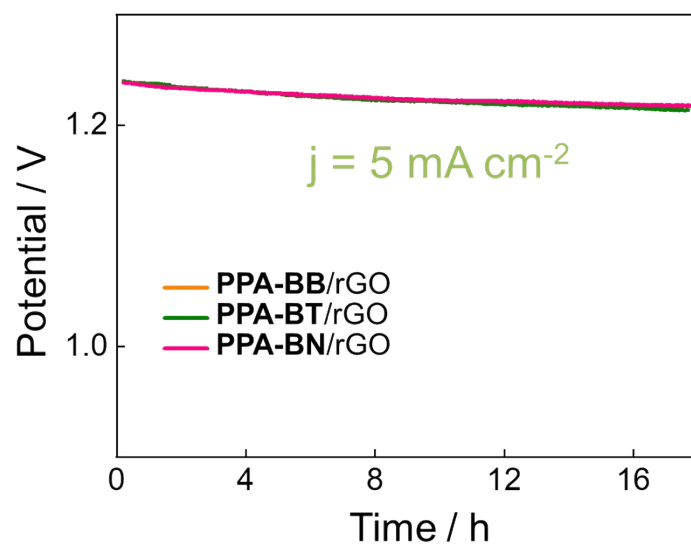

Fig. S16 Galvanostatic discharge curve of **PPA-BB/rGO**, **PPA-BT/rGO**, and **PPA-BN/rGO** based ZABs (6.0 M KOH electrolyte).

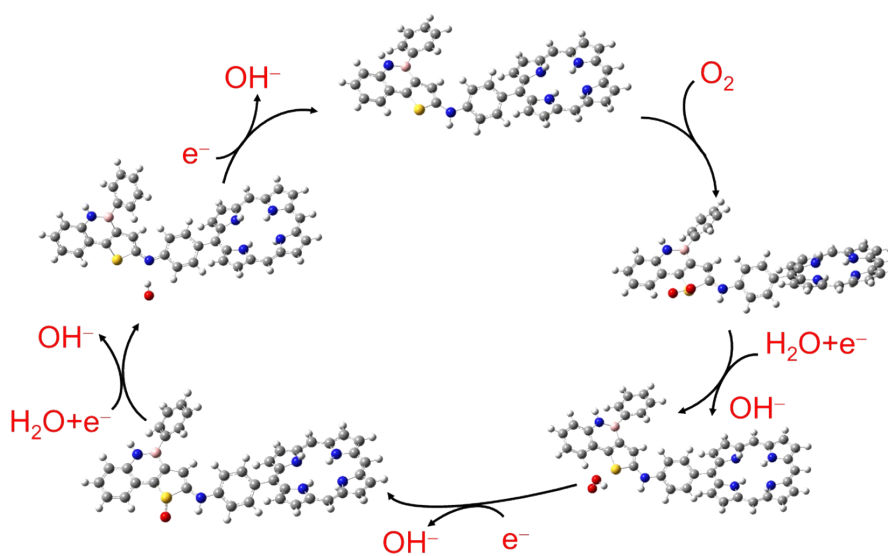

Fig. S17 Theoretical ORR catalytic process of active site-5 in **PPA-BN**.

Table S1. The free energy values of different sites in **PPA-BN**.

| Site          | 1     | 2     | 3     | 4     | 5     | 6     |
|---------------|-------|-------|-------|-------|-------|-------|
| Overpotential | 1.85  | 3.12  | 1.01  | 0.74  | 0.71  | 0.93  |
| $\Delta G1$   | 0.21  | 1.36  | 0.81  | 0.56  | 0.71  | 0.93  |
| $\Delta G2$   | -2.44 | -3.59 | -1.58 | -1.39 | -0.79 | -1.02 |
| $\Delta G3$   | 1.85  | 3.12  | 1.01  | -0.74 | -0.63 | 0.45  |
| $\Delta G4$   | -0.38 | -0.89 | -0.24 | 0.09  | 0.71  | -0.36 |

Table S2. The free energy values of different sites in **PPA-BT**.

| Site          | 2     | 3     | 4 | 5     | 6     |
|---------------|-------|-------|---|-------|-------|
| Overpotential | 1.32  | 1.21  |   | 0.78  | 0.77  |
| $\Delta G1$   | 0.88  | 0.93  |   | 0.49  | 0.72  |
| $\Delta G2$   | -1.89 | -1.71 |   | -0.58 | -1.31 |
| $\Delta G3$   | 1.32  | 1.21  |   | -0.70 | 0.77  |
| $\Delta G4$   | -0.32 | -0.43 |   | 0.78  | -0.18 |

Table S3. The free energy values of different sites in **PPA-BB**.

| Site          | 2     | 3     | 4     | 5     | 6     |
|---------------|-------|-------|-------|-------|-------|
| Overpotential | 1.29  | 1.01  | 1.16  | 1.12  | 1.32  |
| $\Delta G1$   | 1.29  | 1.01  | 1.16  | 1.12  | 1.32  |
| $\Delta G2$   | -1.47 | -1.02 | -1.20 | -1.12 | -1.11 |
| $\Delta G3$   | 0.90  | 0.64  | 0.66  | -0.67 | 0.61  |
| $\Delta G4$   | -0.73 | -0.63 | -0.60 | 0.67  | -0.83 |

### 3. NMR spectra

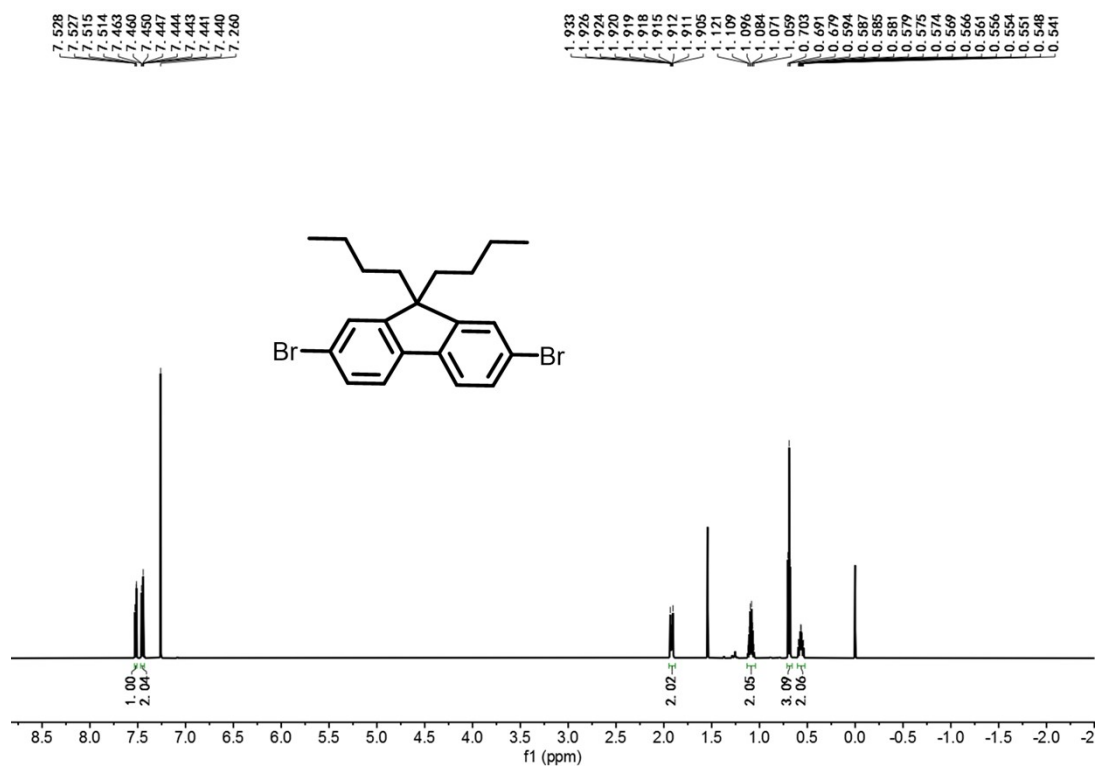

Fig. S18. <sup>1</sup>H NMR spectrum of BB.

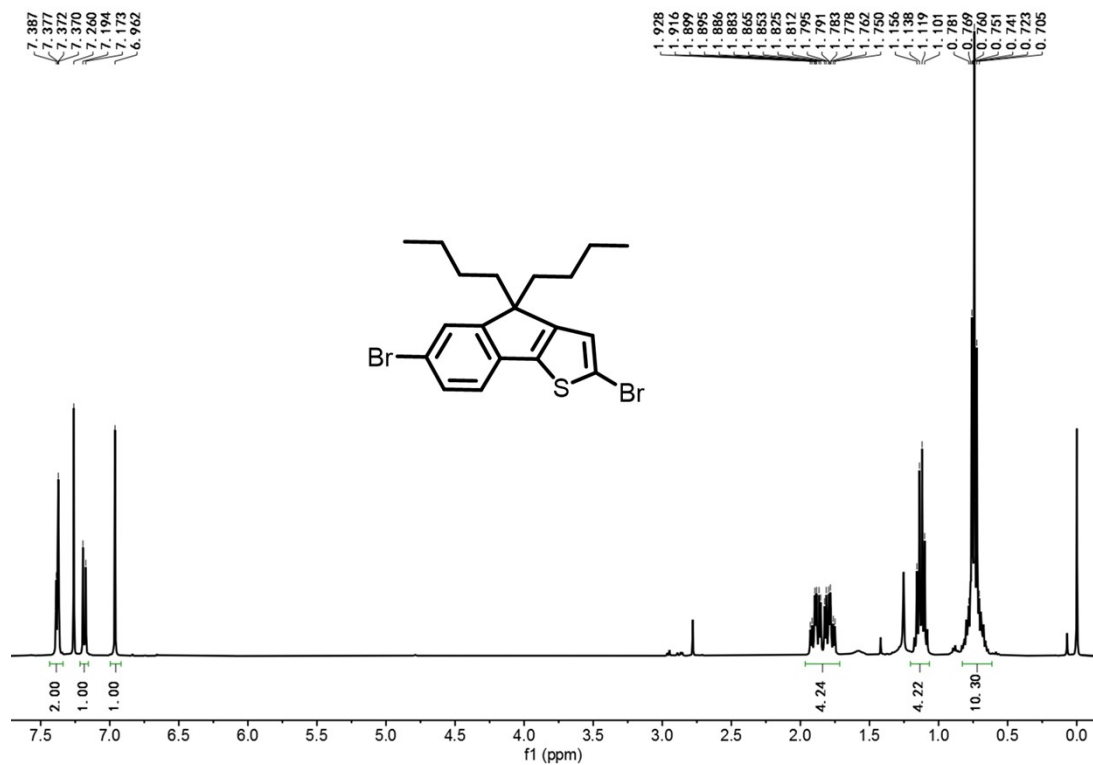

Fig. S19. <sup>1</sup>H NMR spectrum of BT.

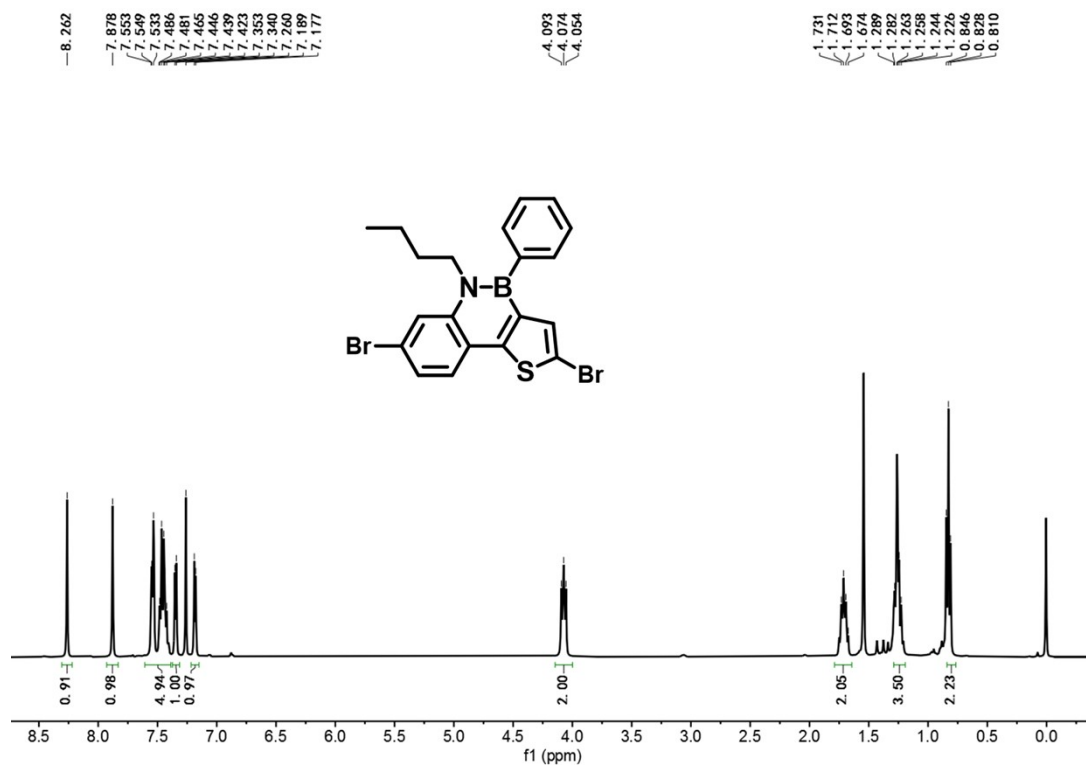

Fig. S20. <sup>1</sup>H NMR spectrum of BN.
